# Supplementary material
Source: HighWire-hosted journal article supplement (http://www.ajevonline.org/highwire/filestream/9363/field_highwire_adjunct_files/0/343SuppData.pdf)
Supplement: 343SuppData.pdf [file 343SuppData.pdf]

## Supplemental Data for:

Reynolds, A.G., D. Sorokowsky, and W. Gensler. 2012.

Evapotranspiration-based irrigation scheduling for syrah: Assessing vine water status by petiole electrical potential.

Am. J. Enol. Vitic. 63:343-356. doi: 10.5344/ajev.2012.11072.

**Supplemental Table 1** Aroma, flavor, and mouthfeel standards for sensory evaluation of Syrah wine treatments.

| Abbrubute            | Standard                                                                | Preparation (added to 50 mL neutral red wine) |
|----------------------|-------------------------------------------------------------------------|-----------------------------------------------|
| Red fruit            | Mixture of E.D. Smith strawberry jam plus fresh raspberry juice         | 18.6 g strawberry jam + 8 mL raspberry juice  |
| Black fruit          | Mixture of Stewart's black cherry juice plus Ribena concentrate         | 75 mL black cherry juice + 50 mL Ribena       |
| Black pepper         | Black pepper                                                            | 0.5 mL stock <sup>a</sup>                     |
| Vegetal              | Mixture of Del Monte cut whole green beans plus fresh green bell pepper | 20 mL pureed beans + 1 mL pureed bell pepper  |
| Anise                | Anise seeds                                                             | 0.25 g crushed seeds                          |
| Chocolate            | Hershey chocolate syrup                                                 | 6.08 g syrup                                  |
| Lavender             | Fresh cut lavender                                                      | 0.5 g chopped stems and leaves                |
| Tar                  | Asphalt-based roof shingle                                              | 15 g piece                                    |
| Astringency          | Aluminum sulfate (SIGMA)                                                | 0.9 g aluminum sulfate in 450 mL water        |
| Bitterness           | Quinine sulfate                                                         | 0.1 g quinine sulfate/L water                 |
| Acidity              | Tartaric acid                                                           | 1.5 g tartaric acid/L water                   |
| Pectin (for rinsing) | Pectin from apple (SIGMA)                                               | 1.25 g pectin in 250 mL water                 |

<sup>a</sup>1 tsp ground black pepper in 10 mL of neutral red table wine.

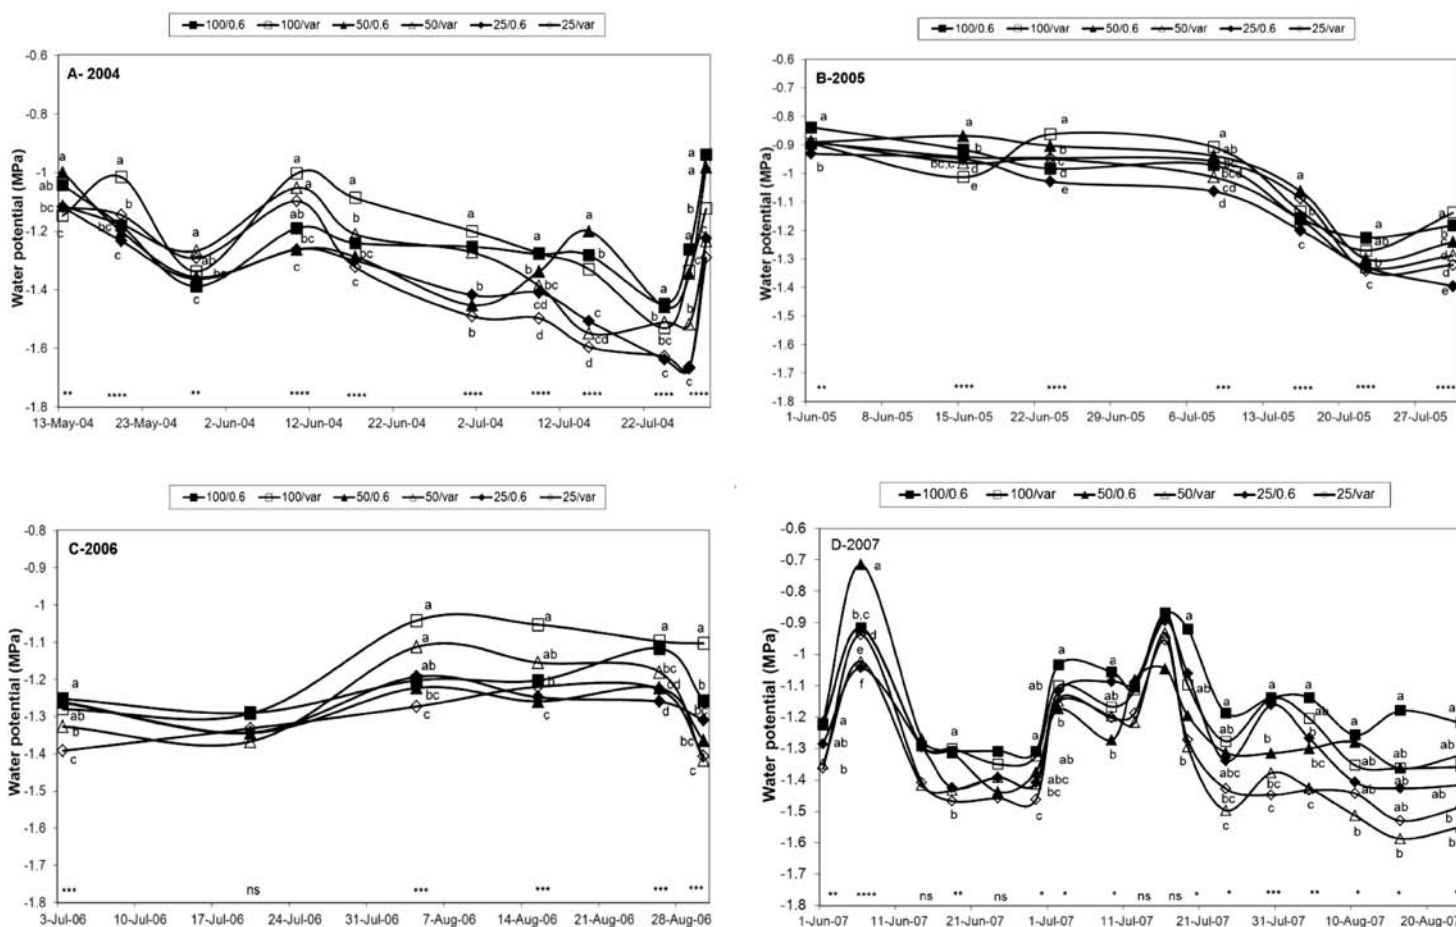

**Supplemental Figure 1** Leaf water potential of Syrah grapevines in response to three irrigation treatments, Esparto, CA, in 2004 (A), 2005 (B), 2006 (C), 2007 (D). \*, \*\*, \*\*\*, \*\*\*\*, and ns indicate significance at  $p < 0.05$ , 0.01, 0.001, 0.0001, and not significant, respectively. Means associated with different letters are significantly different for that sampling date,  $p < 0.05$ , Duncan's multiple range test.
